# Supplementary material for: Association of a multibiomarker disease activity score at multiple time-points with radiographic progression in rheumatoid arthritis: results from the SWEFOT trial
Source: PubMed Central journal article supplement — RMD Open. 2016 Mar 1;2(1):e000197. doi: 10.1136/rmdopen-2015-000197 (PMC4780313; doi:10.1136/rmdopen-2015-000197), 2016-03-01
Supplement: rmdopen-2015-000197supp_table.pdf [file rmdopen-2015-000197supp_table.pdf]

**Supplementary Table S1.** Predictive capacity of the MBDA score at multiple time-points

| MBDA score at:         | %RRP (BL-Year 1) N=205†                                                                                                                                                  | %RRP (Year 1-Year 2) N=121                                                                                                                                                                              |
|------------------------|--------------------------------------------------------------------------------------------------------------------------------------------------------------------------|---------------------------------------------------------------------------------------------------------------------------------------------------------------------------------------------------------|
| Baseline               | Low/moderate vs high<br>1/33 (3%) vs 36/172 (21%)<br>Sensitivity=0.97,<br>specificity=0.19<br>NPV=0.97, PPV=0.21                                                         | Low/moderate vs high<br>1/17 (6%) vs 16/104 (15%)<br>Sensitivity=0.94, specificity=0.15<br>NPV=0.94, PPV=0.15                                                                                           |
| Month 3                | Low vs moderate/high<br>1/33 (3%) vs 36/172 (21%)<br>Sensitivity=0.97,<br>specificity=0.19<br>NPV=0.97, PPV=0.21                                                         | Low vs moderate/high<br>0/15 (0%) vs 17/106 (16%)<br>Sensitivity=1.00, specificity=0.14<br>NPV=1.00, PPV=0.16                                                                                           |
| Year 1                 | NA                                                                                                                                                                       | Low/moderate vs high<br>5/87 (6%) vs 12/34 (35%)<br>Sensitivity=0.71, specificity=0.79<br>NPV=0.94, PPV=0.35                                                                                            |
| Change of MBDA:        | %RRP (BL-Year 1) N=205                                                                                                                                                   | %RRP (Year 1-Year 2) N=121                                                                                                                                                                              |
| from BL to Month 3     | Low/moderate at BL OR high<br>→ low vs high → moderate<br>OR persistent high<br>2/50 (4%) vs 35/155 (23%)<br>Sensitivity=0.95,<br>specificity=0.29<br>NPV=0.96, PPV=0.23 | NA                                                                                                                                                                                                      |
| from BL to Year 1      | NA                                                                                                                                                                       | Low/moderate at BL OR high →<br>moderate/low vs persistent high<br>5/90 (6%) vs 12/31 (39%)<br>Sensitivity=0.71, specificity=0.82<br>NPV=0.94, PPV=0.39                                                 |
| from Month 3 to Year 1 | NA                                                                                                                                                                       | Low at M3, OR moderate/high (M3)<br>AND achieving low/moderate (Year1) vs<br>moderate → high OR persistent high<br>5/88 vs (6%) 12/33 (36%)<br>Sensitivity=0.71, specificity=0.80<br>NPV=0.94, PPV=0.36 |

†The same patient numbers and proportion of RRP (BL-Year 1) in low/moderate vs high groups according to the MBDA score at baseline or low vs moderate/high groups according to the MBDA score at Month 3 (the first two cells of the second column) does not mean that they are exactly the same patients in the respective groups. For more details see Figure 3A, left bar-graph.
